# Supplementary material
Source: Springer Nature journal article supplement (https://www.springermedizin.de/resource/supplementary/12935_2011_315_MOESM2_ESM.pdf/9540292)

VEGF (pg/ml)

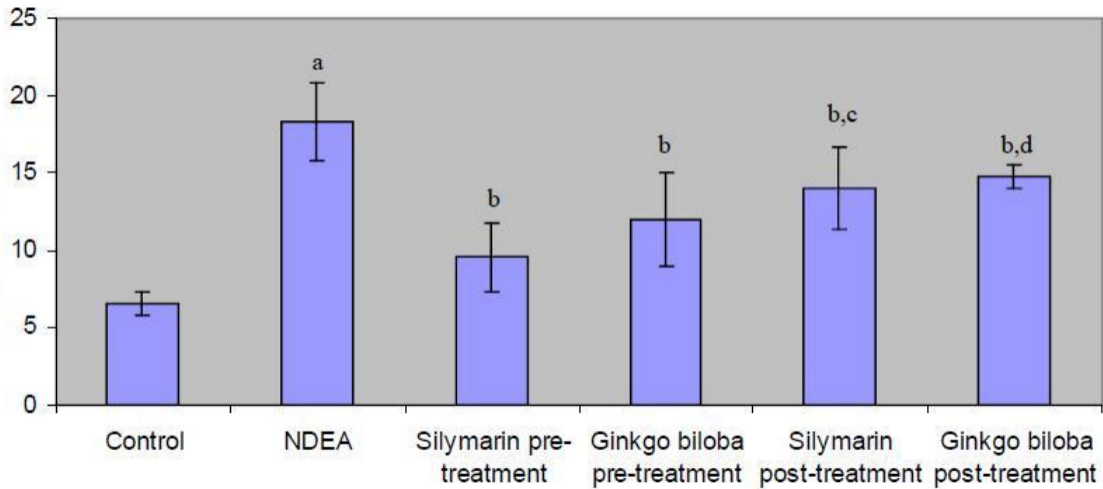

Supplement: MOESM2 [file 9540292]
